# Supplementary material
Source: PubMed Central journal article supplement (PMC6105894)
Supplement: zii999092531s1.pdf [file zii999092531s1.pdf]

1 Antibodies to VAR2CSA and Merozoite Antigens in Pregnant Women living in Yaoundé, Cameroon  
 2 on Pregnancy Outcomes

3

4 **Supplemental Information**

5

6 Table S1. Information on the age of women in the 4 gravidity groups

| Grav | N Obs | Mean | Std Dev | Minimum | 25th Pctl | Median | 75th Pctl | Maximum |
|------|-------|------|---------|---------|-----------|--------|-----------|---------|
| 1    | 361   | 21.4 | 4.0     | 14.0    | 19.0      | 21.0   | 23.0      | 40.0    |
| 2    | 289   | 23.9 | 4.4     | 15.0    | 20.0      | 23.0   | 26.0      | 40.0    |
| 3    | 220   | 25.8 | 4.0     | 16.0    | 23.0      | 25.0   | 28.0      | 41.0    |
| 4+   | 472   | 30.4 | 4.9     | 18.0    | 27.0      | 30.0   | 34.0      | 43.0    |

7

8

9 Table S2

10 Supplemental Table 2: The Influence of Antibodies to FV2 and Merozoite Antigens on Pregnancy Outcome in  
 11 PM- Women

|                          | <b>Anemia</b>        | <b>High parasitemia*</b> | <b>LBW</b>           | <b>Pre-term delivery</b> |
|--------------------------|----------------------|--------------------------|----------------------|--------------------------|
| <b>FV2</b>               | 1.535 (1.039, 2.266) | n/a                      | 1.136 (0.761, 1.696) | 1.506 (1.056, 2.148)     |
| <b>MSP1<sub>42</sub></b> | 1.012 (0.697, 1.469) | n/a                      | 0.863 (0.594, 1.254) | 0.843 (0.599, 1.186)     |
| <b>MSP2</b>              | 1.156 (0.766, 1.746) | n/a                      | 0.864 (0.579, 1.289) | 1.339 (0.905, 1.982)     |
| <b>MSP3</b>              | 1.166 (0.717, 1.895) | n/a                      | 1.043 (0.641, 1.697) | 1.122 (0.726, 1.734)     |
| <b>MSP11</b>             | 1.369 (0.724, 2.589) | n/a                      | 1.468 (0.811, 2.658) | 1.951 (1.153, 3.302)     |
| <b>AMA1</b>              | 1.168 (0.683, 1.997) | n/a                      | 0.942 (0.563, 1.576) | 1.711 (0.985, 2.971)     |
| <b>EBA-175</b>           | 1.289 (0.828, 2.009) | n/a                      | 1.237 (0.796, 1.924) | 1.343 (0.894, 2.016)     |
| <b>Pf41</b>              | 0.927 (0.638, 1.348) | n/a                      | 0.803 (0.549, 1.175) | 0.992 (0.704, 1.398)     |

ORs with 95% CI reported were based on logistic models, adjusted for age and gravidity.  
 \* Parasitemia not available for PM- women

12

13

14 FIG. S1

15

16 **A**

17

18

19

20

21

22

23

24

25

26

27

28

29

30

31

32

33

34

35

36

37

38

39

40

41

42

43

44

45

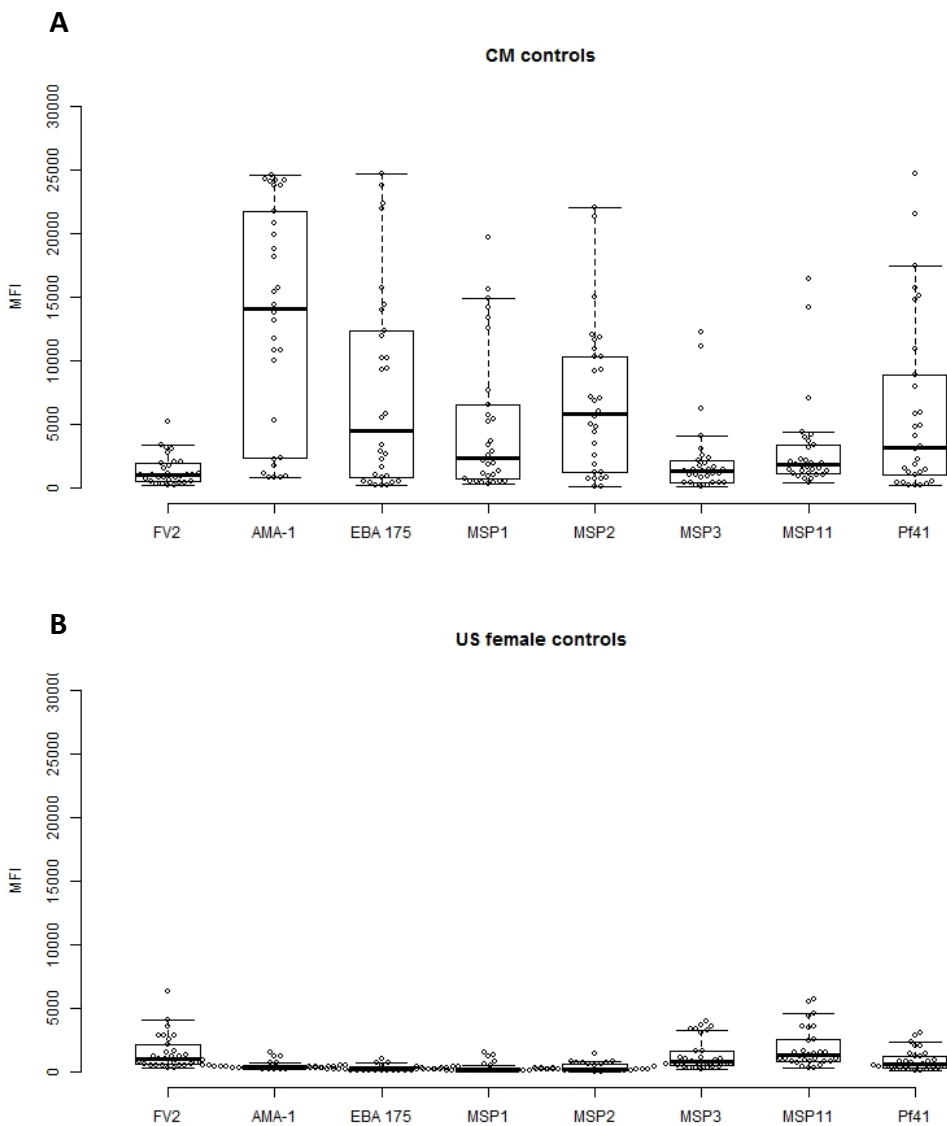

Supplemental Figure. 1 Distribution of Ab levels in the controls used to determine the cut-off for positivity (mean + 2SD). (A) Data for 30 Cameroonian male adults who had Ab to the merozoite antigens, but not FV2. (B) Data for 30 plasma samples collected at delivery from US negative control women who lacked Ab to the merozoite antigens. Cut-off values for Ab positivity for each antigen was, FV2:3709; AMA1:1138; EBA-175:739; MSP1<sub>42</sub>:1153; MSP2:1042; MSP3:3850; MSP11:5046; Pf41:2563.

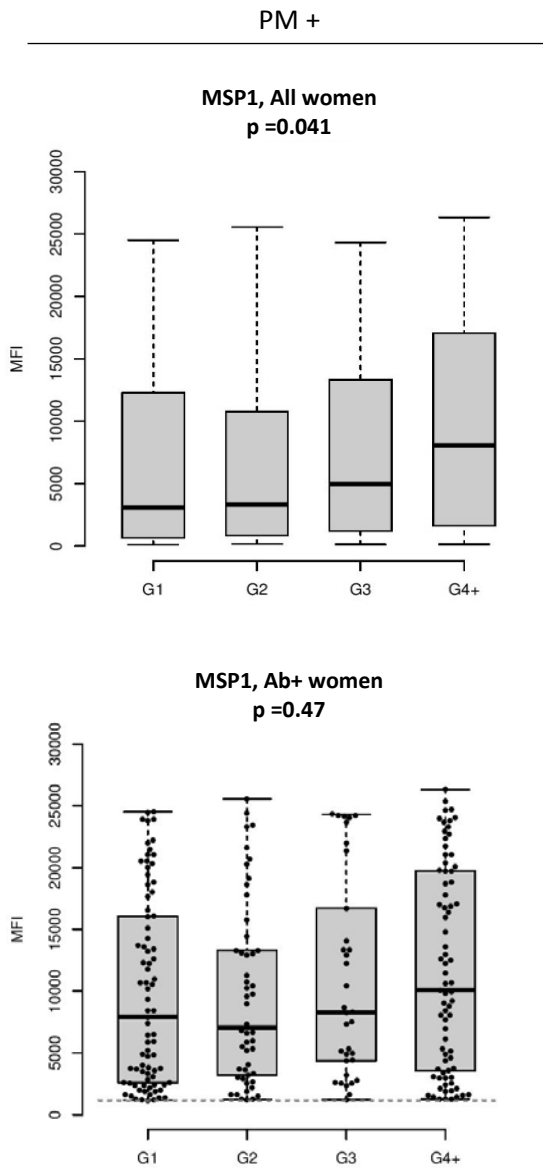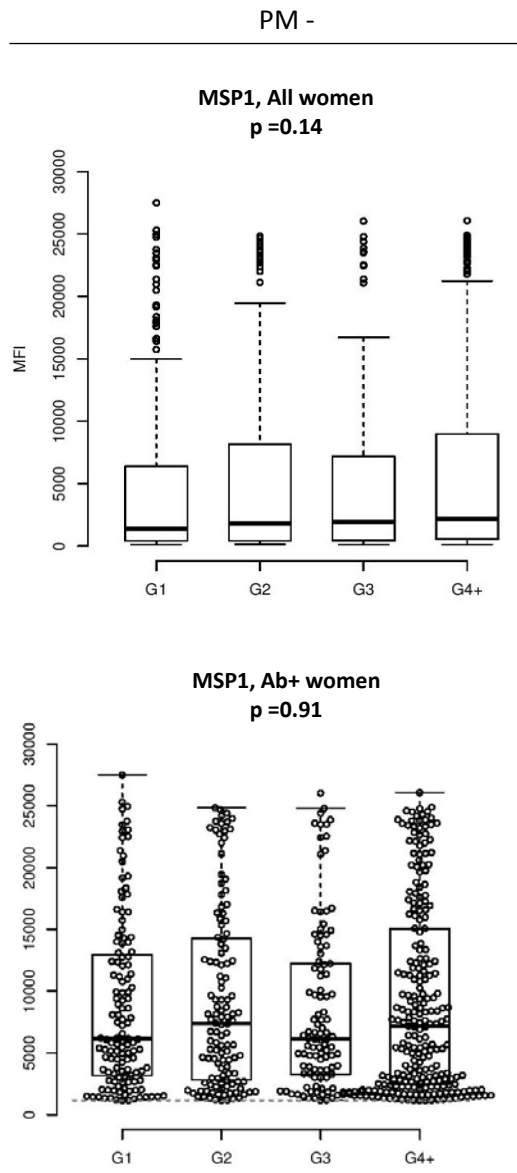

132

133

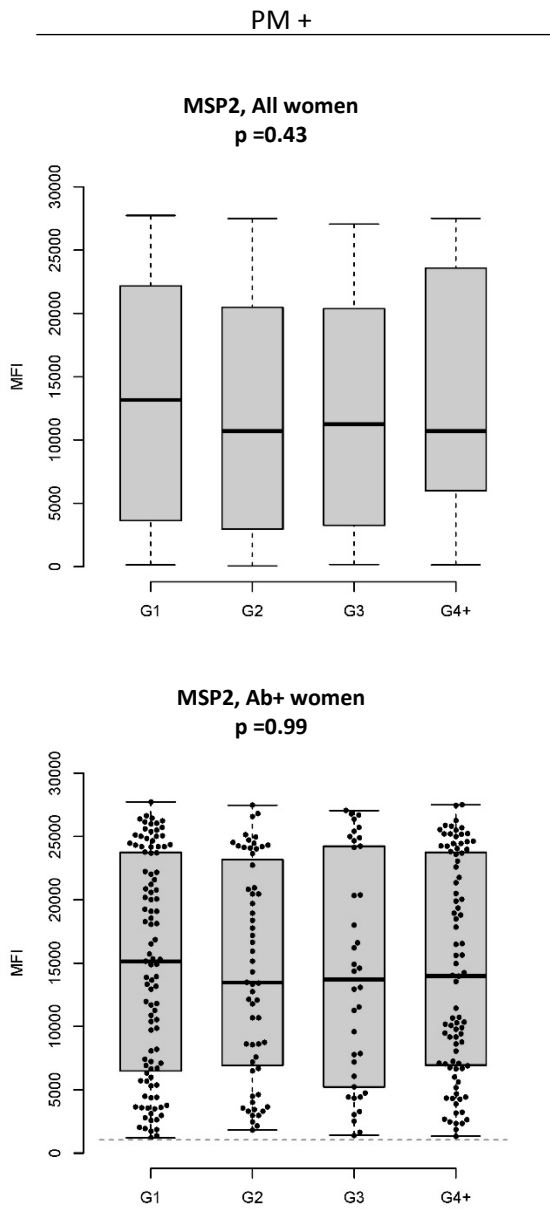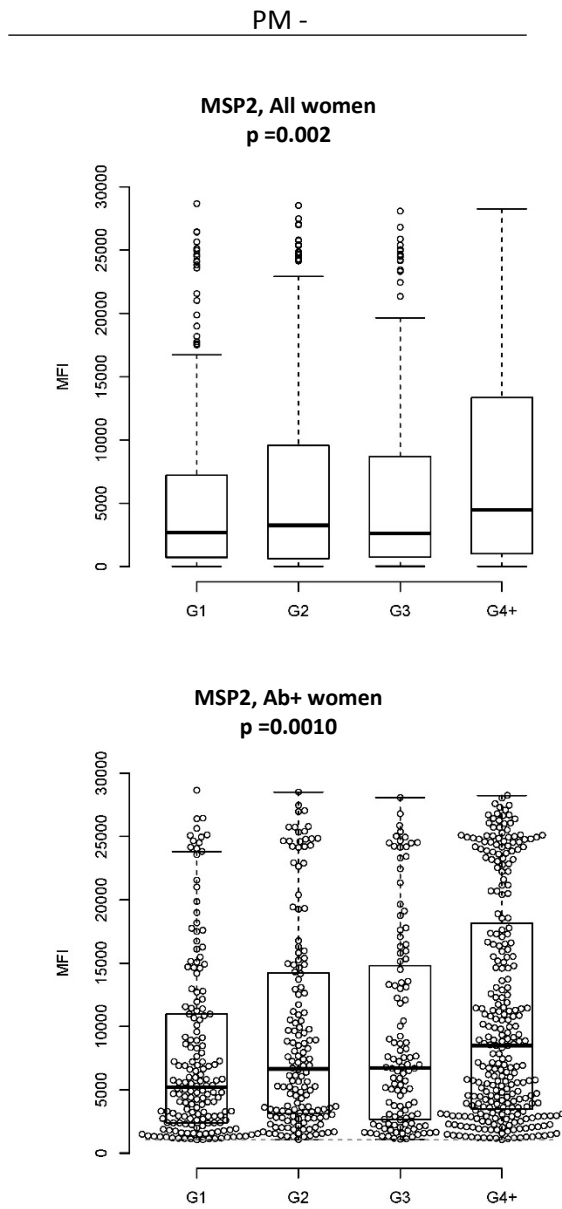

134

135

136

137

138

139

140

141

142

49  
50  
51  
52  
53  
54  
55  
56  
57  
58  
59  
60  
61  
62  
63  
64  
65  
66  
67  
68  
69  
70  
71  
72  
73  
74  
75  
76

PM +

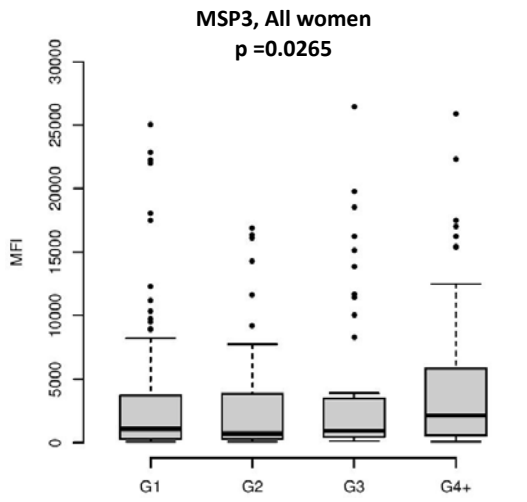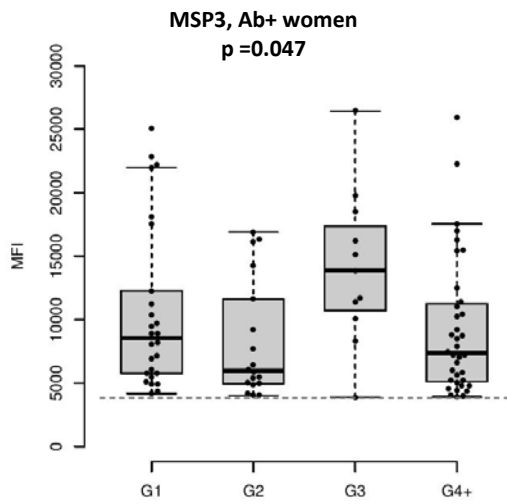

PM -

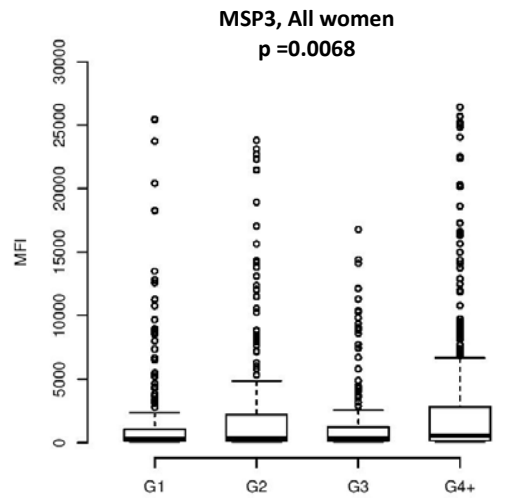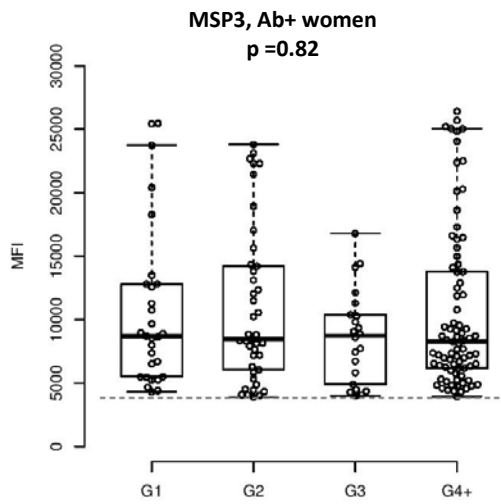

143

144

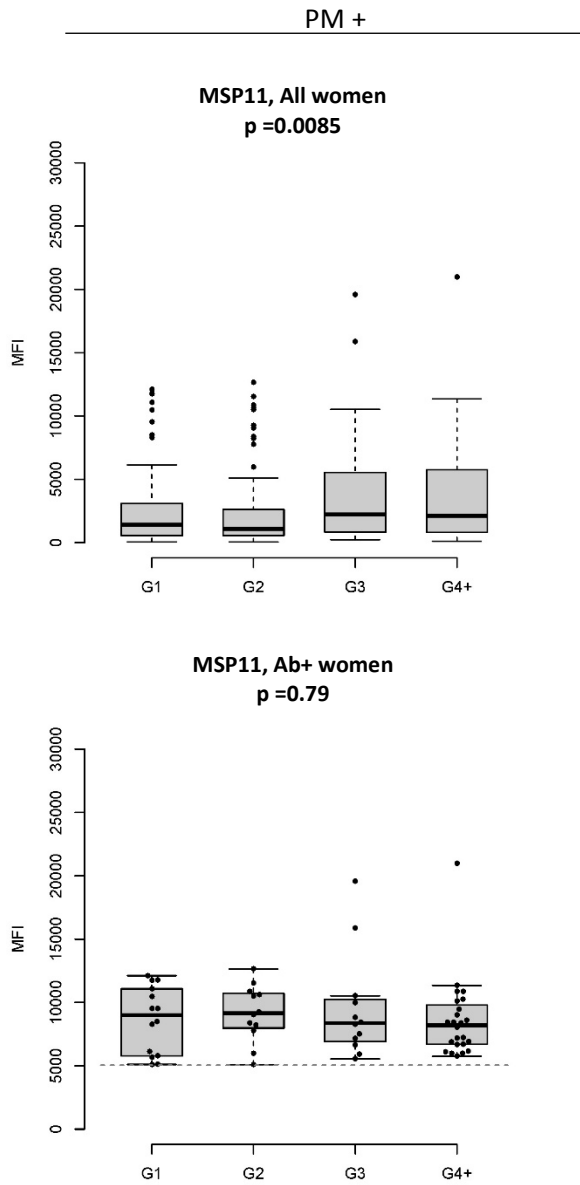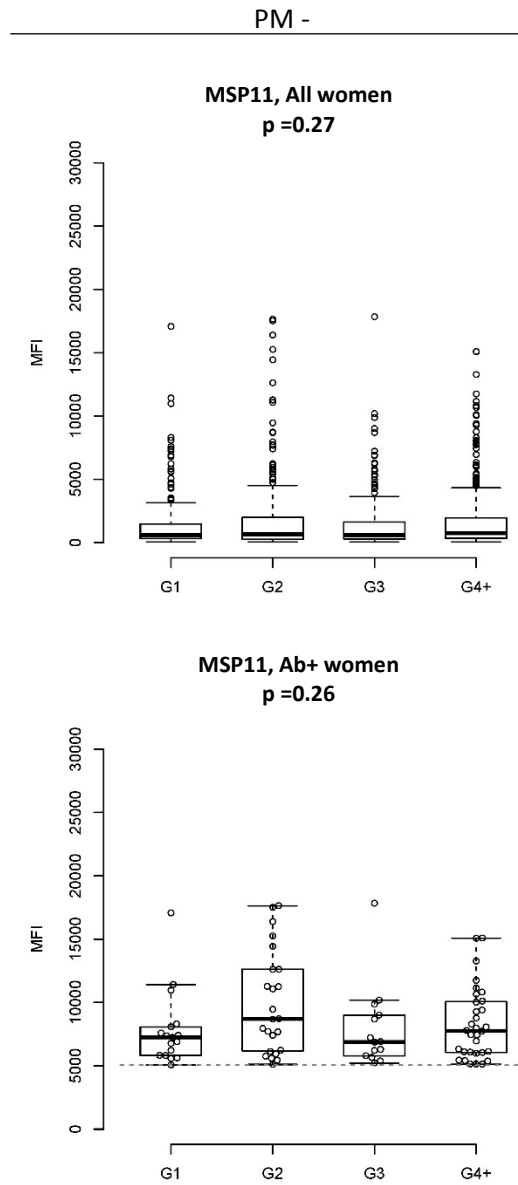

145

146

147

148

149

150

151

152

153

77  
78  
79  
80  
81  
82  
83  
84  
85  
86  
87  
88  
89  
90  
91  
92  
93  
94  
95  
96  
97  
98  
99  
100  
101  
102  
103  
104

PM +

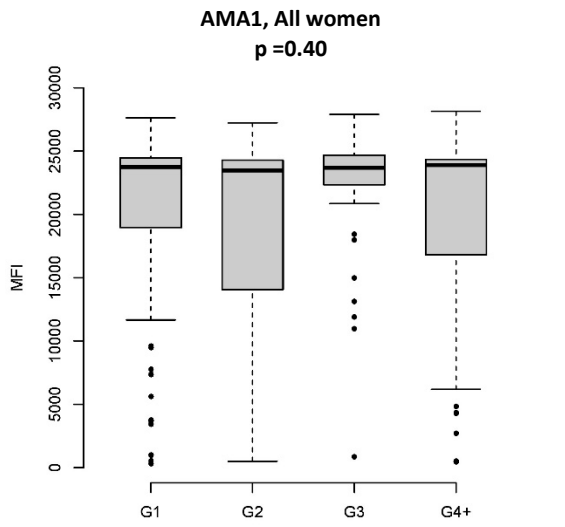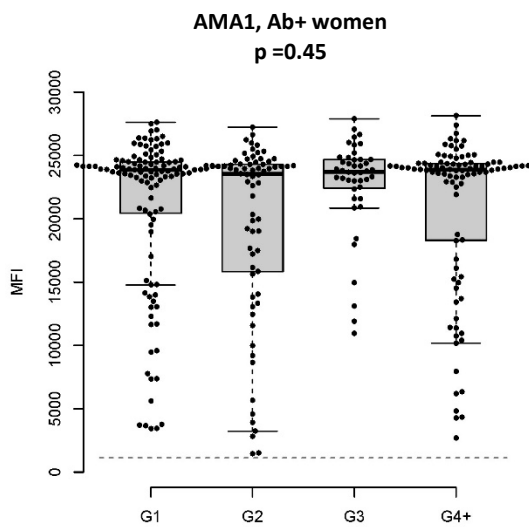

PM -

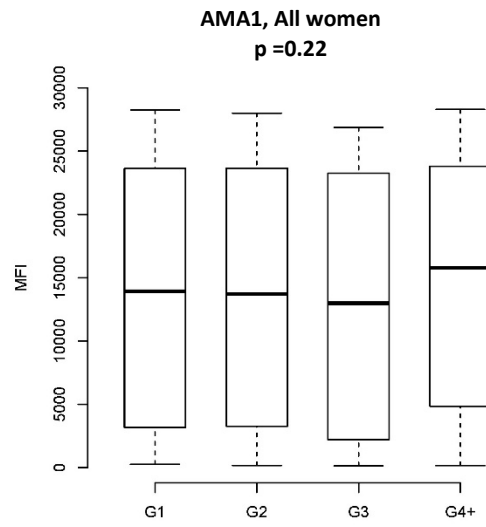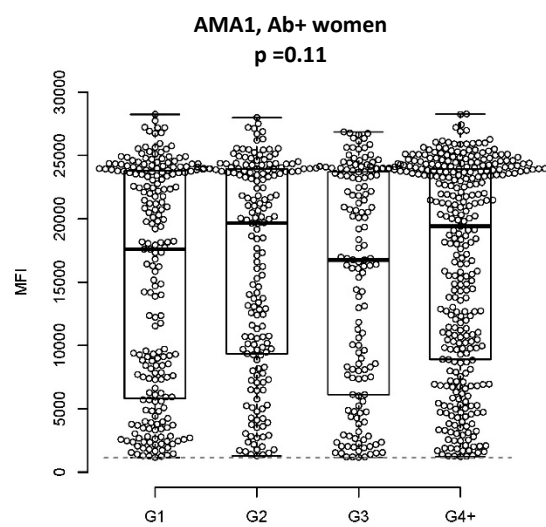

105

106

107

108

109

110

111

112

113

114

115

116

117

118

119

120

121

122

123

124

125

126

127

128

129

130

131

PM +

EBA-175, All women  
p = 0.031

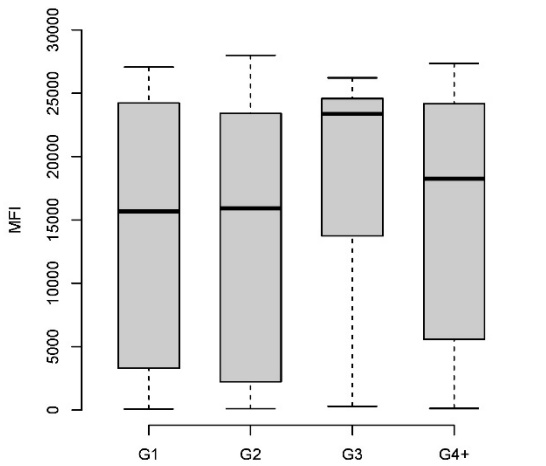

PM -

EBA-175, All women  
p = 0.077

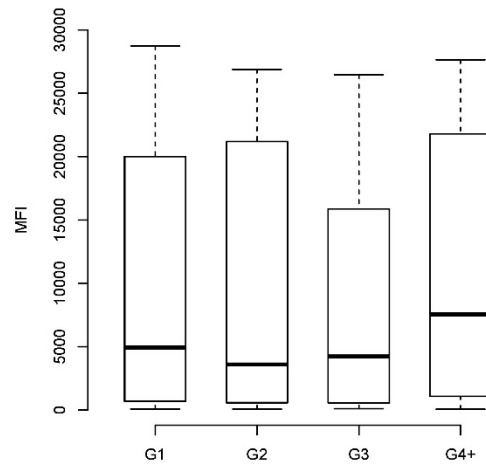

EBA-175, Ab+ women  
p = 0.21

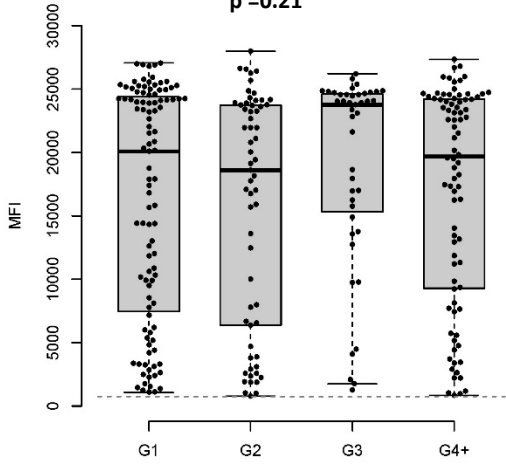

EBA-175, Ab+ women  
p = 0.44

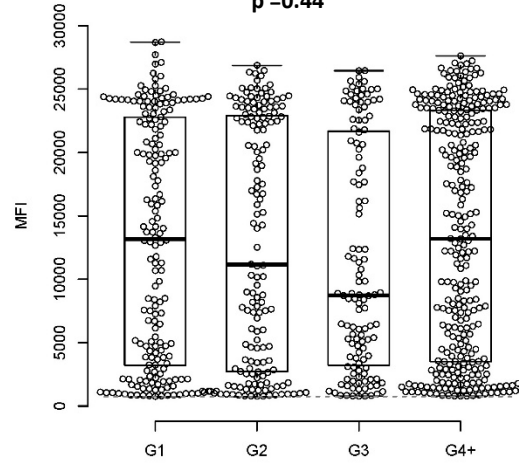



154

155

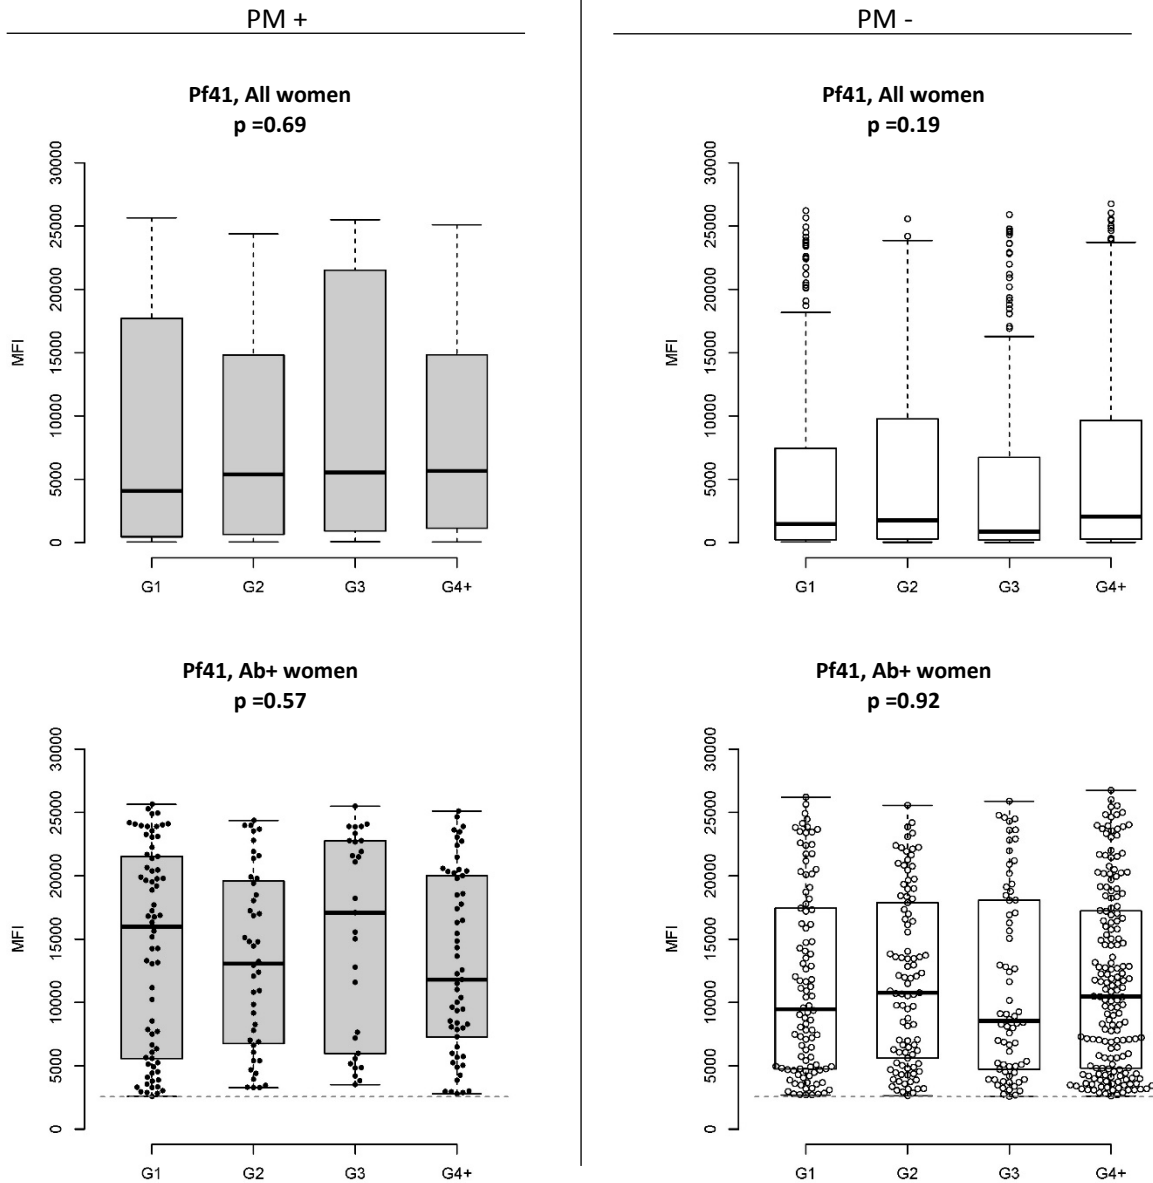

156

157 Supplemental Figure 2. Distribution of mean Ab levels in PM+ (n=328) and PM- (n=1,014) women, and in

158 women who have Ab, stratified by gravidity (G). P values were based on the Cochran-Armitage trend tests.

159 Boxes illustrate the median and IQR of the median fluorescence intensity (MFI)
